# Supplementary material for: The Impact of Purple-Flesh Potato (Solanum tuberosum L.) cv. “Shadow Queen” on Minor Health Complaints in Healthy Adults: A Randomized, Double-Blind, Placebo-Controlled Study
Source: MDPI journal article supplement (doi:10.3390/nu14122446), 2022-06-13
Supplement: s1 [file s1]

**Table S1.** Key eligibility and exclusion criteria.

| <b>Eligibility criteria:</b>                                                                                                                                                                                                 |
|------------------------------------------------------------------------------------------------------------------------------------------------------------------------------------------------------------------------------|
| 1. Subjects who have fully understood the significance, content, and purpose of this study and have given written consent to participate in this study.                                                                      |
| 2. Healthy Japanese men and women aged 50–70 years.                                                                                                                                                                          |
| 3. Subjects who have minor health complaints (assessed by a questionnaire for stress)                                                                                                                                        |
| <b>Key exclusion criteria:</b>                                                                                                                                                                                               |
| 1. Subjects who are under physician's advice, treatment, and/or medication for schizophrenia, depression, mania, neurological disorders, and/or sleep disorders.                                                             |
| 2. Subjects with serious cerebrovascular, cardiac, hepatic, renal, gastrointestinal diseases, and/or affected with infectious diseases requiring reports to the authorities.                                                 |
| 3. Subjects with a major surgical history relevant to the digestive system such as gastrectomy, gastrorrhaphy, and enterectomy.                                                                                              |
| 4. Subjects with unusually high and/or low blood pressure and/or abnormal hematological data.                                                                                                                                |
| 5. Subjects with severe anemia.                                                                                                                                                                                              |
| 6. Pre- or postmenopausal women complaining of obvious physical changes.                                                                                                                                                     |
| 7. Subjects who are at risk of having allergic reactions to drugs or foods especially based on potatoes, Betulaceae, and Poaceae.                                                                                            |
| 8. Subjects who regularly take medicine, functional foods, and/or supplements that would affect sleep and/or stress.                                                                                                         |
| 9. Heavy smokers, alcohol addicts, or subjects with disordered lifestyle.                                                                                                                                                    |
| 10. Subjects who donated either 400 mL whole blood within 16 weeks (women), 12 weeks (men), 200 mL whole blood within 4 weeks (men and women), or blood components within 2 weeks (men and women), before the current study. |
| 11. Pregnant or lactating women or women who expect to be pregnant during this study.                                                                                                                                        |
| 12. Subjects who currently participate in other clinical trials, or participated within the last 4 weeks before the current study.                                                                                           |
| 13. Any other medical and/or health reasons unfavorable to participation in the current study, as judged by the principal investigator.                                                                                      |

**Table S2.** The change in hematological and biochemical parameters after taking "Shadow Queen" or placebo "Haruka" potato.

| Biochemical parameter                         | Intervention   | Week 0         | Week 4                    | Week 8                     | ΔWeek 4       | ΔWeek 8       |
|-----------------------------------------------|----------------|----------------|---------------------------|----------------------------|---------------|---------------|
| Body fat ratio (%)                            | "Haruka"       | 30.21 ± 5.73   | 30.08 ± 6.37              | 30.19 ± 6.11               | -0.14 ± 1.05  | -0.02 ± 0.66  |
|                                               | "Shadow Queen" | 25.21 ± 8.31   | 25.74 ± 9.11              | 26.11 ± 8.89 <sup>#</sup>  | 0.53 ± 1.16   | 0.90 ± 0.90   |
|                                               | <i>p</i> value | -              | -                         | -                          | 0.263         | 0.039 *       |
| Body mass index (kg/m <sup>2</sup> )          | "Haruka"       | 22.45 ± 2.92   | 22.45 ± 2.94              | 22.50 ± 2.93               | 0.00 ± 0.46   | 0.05 ± 0.41   |
|                                               | "Shadow Queen" | 20.79 ± 2.22   | 20.71 ± 2.09              | 20.93 ± 2.32               | -0.07 ± 0.29  | 0.14 ± 0.28   |
|                                               | <i>p</i> value | -              | -                         | -                          | 0.730         | 0.624         |
| Systolic blood pressure (mmHg)                | "Haruka"       | 106.13 ± 14.34 | 109.25 ± 16.65            | 119.75 ± 17.81             | 3.13 ± 9.70   | 13.63 ± 13.63 |
|                                               | "Shadow Queen" | 101.29 ± 8.98  | 99.0 ± 10.66              | 104.14 ± 10.27             | -3.00 ± 7.56  | 2.86 ± 7.88   |
|                                               | <i>p</i> value | -              | -                         | -                          | 0.225         | 0.090         |
| Diastolic blood pressure (mmHg)               | "Haruka"       | 77.38 ± 10.42  | 78.50 ± 11.75             | 84.63 ± 10.01 <sup>#</sup> | 1.13 ± 4.82   | 7.25 ± 4.80   |
|                                               | "Shadow Queen" | 69.71 ± 6.82   | 71.50 ± 9.09              | 71.43 ± 9.80               | 1.67 ± 6.19   | 1.71 ± 9.09   |
|                                               | <i>p</i> value | -              | -                         | -                          | 0.857         | 0.156         |
| Pulse (bpm)                                   | "Haruka"       | 76.75 ± 8.07   | 77.88 ± 11.95             | 82.25 ± 21.59              | 1.13 ± 9.75   | 5.5 ± 17.16   |
|                                               | "Shadow Queen" | 72.29 ± 11.27  | 72.17 ± 11.00             | 67.57 ± 9.03 <sup>#</sup>  | -0.67 ± 8.57  | -4.71 ± 3.99  |
|                                               | <i>p</i> value | -              | -                         | -                          | 0.727         | 0.149         |
| Blood cell count<br>WBC (10 <sup>3</sup> /μL) | "Haruka"       | 5.64 ± 2.08    | 4.95 ± 1.58               | 4.81 ± 1.52                | -0.69 ± 1.42  | -0.83 ± 1.50  |
|                                               | "Shadow Queen" | 4.53 ± 1.04    | 4.50 ± 0.93               | 4.17 ± 0.79                | -0.03 ± 0.41  | -0.36 ± 0.61  |
|                                               | <i>p</i> value | -              | -                         | -                          | 0.258         | 0.456         |
| RBC (10 <sup>4</sup> /μL)                     | "Haruka"       | 479.9 ± 40.0   | 468.1 ± 37.4              | 478.5 ± 41.2               | -11.8 ± 15.0  | -1.38 ± 14.1  |
|                                               | "Shadow Queen" | 428.3 ± 45.9   | 437.1 ± 49.3              | 432.1 ± 41.9               | 8.86 ± 18.3   | 3.86 ± 17.0   |
|                                               | <i>p</i> value | -              | -                         | -                          | 0.032         | 0.526         |
| Hg (g/dL)                                     | "Haruka"       | 13.99 ± 1.13   | 13.76 ± 1.11              | 13.88 ± 0.98               | -0.23 ± 0.41  | -0.11 ± 0.34  |
|                                               | "Shadow Queen" | 13.03 ± 1.05   | 13.34 ± 1.06              | 13.10 ± 0.99               | 0.31 ± 0.58   | 0.07 ± 0.55   |
|                                               | <i>p</i> value | -              | -                         | -                          | 0.055         | 0.446         |
| Ht (%)                                        | "Haruka"       | 42.89 ± 2.76   | 41.81 ± 2.89 <sup>#</sup> | 42.11 ± 2.54               | -1.08 ± 1.28  | -0.78 ± 1.07  |
|                                               | "Shadow Queen" | 40.09 ± 2.95   | 40.53 ± 3.10              | 39.51 ± 2.65               | 0.44 ± 1.65   | -0.57 ± 1.51  |
|                                               | <i>p</i> value | -              | -                         | -                          | 0.067         | 0.766         |
| Plt (10 <sup>4</sup> /μL)                     | "Haruka"       | 25.50 ± 3.52   | 25.51 ± 3.11              | 25.23 ± 3.73               | 0.01 ± 1.09   | -0.28 ± 1.49  |
|                                               | "Shadow Queen" | 24.19 ± 4.83   | 24.33 ± 4.60              | 23.14 ± 2.99               | 0.14 ± 1.45   | -1.04 ± 3.75  |
|                                               | <i>p</i> value | -              | -                         | -                          | 0.846         | 0.602         |
| Lipid parameter<br>Total cholesterol (mg/dL)  | "Haruka"       | 232.88 ± 33.22 | 230.25 ± 25.45            | 230.75 ± 31.08             | -2.63 ± 16.44 | -2.13 ± 14.68 |
|                                               | "Shadow Queen" | 230.71 ± 30.76 | 239.43 ± 21.27            | 242.14 ± 16.79             | 8.71 ± 22.16  | 11.43 ± 19.85 |
|                                               | <i>p</i> value | -              | -                         | -                          | 0.277         | 0.153         |
| HDL-C (mg/dL)                                 | "Haruka"       | 78.00 ± 18.65  | 77.50 ± 18.34             | 77.50 ± 18.55              | -0.50 ± 5.66  | -0.50 ± 7.69  |
|                                               | "Shadow queen" | 83.29 ± 22.37  | 84.14 ± 21.11             | 84.29 ± 18.71              | 0.86 ± 8.75   | 1.00 ± 7.83   |
|                                               | <i>p</i> value | -              | -                         | -                          | 0.723         | 0.715         |
| LDL-C (mg/dL)                                 | "Haruka"       | 136.88 ± 27.62 | 135.88 ± 26.37            | 131.38 ± 28.76             | -1.00 ± 12.34 | -5.50 ± 10.97 |
|                                               | "Shadow queen" | 136.57 ± 18.07 | 139.86 ± 13.86            | 147.29 ± 12.62             | 3.29 ± 18.53  | 10.71 ± 14.41 |
|                                               | <i>p</i> value | -              | -                         | -                          | 0.602         | 0.028 *       |
| Triglyceride (mg/dL)                          | "Haruka"       | 102.50 ± 96.11 | 123.38 ± 101.50           | 115.13 ± 81.27             | 20.88 ± 25.33 | 12.63 ± 17.25 |
|                                               | "Shadow queen" | 52.43 ± 11.83  | 70.57 ± 31.33             | 80.43 ± 20.65 <sup>#</sup> | 18.14 ± 26.65 | 28.00 ± 29.41 |
|                                               | <i>p</i> value | -              | -                         | -                          | 0.842         | 0.231         |
| Glycometabolism associated parameters         |                |                |                           |                            |               |               |
| Blood glucose (mg/dL)                         | "Haruka"       | 97.88 ± 28.74  | 96.38 ± 27.88             | 95.00 ± 24.69              | -1.50 ± 5.93  | -2.88 ± 7.81  |
|                                               | "Shadow Queen" | 89.86 ± 5.61   | 87.29 ± 4.92              | 86.86 ± 5.46               | -2.57 ± 6.48  | -3.00 ± 6.88  |
|                                               | <i>p</i> value | -              | -                         | -                          | 0.743         | 0.974         |
| HbA1c (%)                                     | "Haruka"       | 5.54 ± 0.79    | 5.56 ± 0.74               | 5.78 ± 0.68 <sup>#</sup>   | 0.03 ± 0.07   | 0.24 ± 0.21   |
|                                               | "Shadow Queen" | 5.20 ± 0.15    | 5.23 ± 0.19               | 5.49 ± 0.18 <sup>#</sup>   | 0.03 ± 0.08   | 0.29 ± 0.07   |
|                                               | <i>p</i> value | -              | -                         | -                          | 0.926         | 0.550         |
| Liver function                                |                |                |                           |                            |               |               |
| AST (U/L)                                     | "Haruka"       | 19.88 ± 2.53   | 20.25 ± 3.28              | 19.63 ± 2.62               | 0.38 ± 2.33   | -0.25 ± 1.28  |
|                                               | "Shadow Queen" | 23.43 ± 3.26   | 22.00 ± 3.65 <sup>#</sup> | 22.43 ± 3.60               | -1.43 ± 1.27  | -1.00 ± 2.38  |
|                                               | <i>p</i> value | -              | -                         | -                          | 0.092         | 0.452         |
| ALT (U/L)                                     | "Haruka"       | 17.13 ± 8.34   | 17.63 ± 8.02              | 16.88 ± 7.64               | 0.50 ± 2.93   | -0.25 ± 1.49  |
|                                               | "Shadow Queen" | 20.00 ± 7.53   | 18.43 ± 7.35              | 20.29 ± 9.53               | -1.57 ± 3.64  | 0.29 ± 4.57   |
|                                               | <i>p</i> value | -              | -                         | -                          | 0.244         | 0.775         |
| γ-GTP (U/L)                                   | "Haruka"       | 17.13 ± 8.34   | 17.63 ± 8.02              | 16.88 ± 7.64               | 2.25 ± 4.89   | 1.88 ± 4.09   |
|                                               | "Shadow Queen" | 20.00 ± 7.53   | 18.43 ± 7.35              | 9.53 ± 9.53                | -1.43 ± 4.28  | -0.43 ± 2.37  |
|                                               | <i>p</i> value | -              | -                         | -                          | 0.148         | 0.214         |

|                                 |                |                |                             |                             |                     |                    |
|---------------------------------|----------------|----------------|-----------------------------|-----------------------------|---------------------|--------------------|
| ALP (U/L)                       | "Haruka"       | 204.75 ± 47.22 | 204.13 ± 48.74              | 208.88 ± 46.68              | -0.63 ± 9.68        | 4.13 ± 18.2        |
|                                 | "Shadow Queen" | 216.00 ± 46.82 | 217.14 ± 45.37              | 219.43 ± 54.61              | 1.14 ± 19.52        | 3.43 ± 19.89       |
|                                 | <i>p</i> value | -              | -                           | -                           | 0.824               | 0.945              |
| LDH (U/L)                       | "Haruka"       | 186.38 ± 21.10 | 188.00 ± 29.91              | 178.75 ± 21.16              | 1.63 ± 22.14        | -7.63 ± 9.26       |
|                                 | "Shadow Queen" | 190.43 ± 22.10 | 176.13 ± 19.39 <sup>#</sup> | 171.14 ± 17.75 <sup>#</sup> | -14.29 ± 10.01      | -19.29 ± 11.53     |
|                                 | <i>p</i> value | -              | -                           | -                           | 0.104               | 0.049 <sup>*</sup> |
| Renal function<br>BUN (mg/dL)   | "Haruka"       | 13.60 ± 2.96   | 13.23 ± 2.77                | 13.51 ± 2.71                | -0.38 ± 1.51        | -0.09 ± 2.46       |
|                                 | "Shadow Queen" | 13.57 ± 2.52   | 14.74 ± 2.61                | 12.67 ± 1.56                | 1.17 ± 2.48         | -0.90 ± 2.37       |
|                                 | <i>p</i> value | -              | -                           | -                           | 0.163               | 0.527              |
| CRE (mg/dL)                     | "Haruka"       | 0.79 ± 0.20    | 0.78 ± 0.19                 | 0.84 ± 0.20 <sup>#</sup>    | -0.01 ± 0.04        | 0.05 ± 0.03        |
|                                 | "Shadow Queen" | 0.74 ± 0.11    | 0.77 ± 0.12                 | 0.81 ± 0.10 <sup>#</sup>    | 0.03 ± 0.03         | 0.07 ± 0.04        |
|                                 | <i>p</i> value | -              | -                           | -                           | 0.086               | 0.208              |
| Uric acid (mg/dL)               | "Haruka"       | 5.21 ± 0.83    | 4.96 ± 1.04                 | 4.98 ± 0.99                 | -0.25 ± 0.38        | -0.24 ± 0.39       |
|                                 | "Shadow Queen" | 4.84 ± 1.56    | 5.31 ± 1.33 <sup>#</sup>    | 5.06 ± 1.03                 | 0.47 ± 0.34         | 0.21 ± 0.6         |
|                                 | <i>p</i> value | -              | -                           | -                           | 0.002 <sup>**</sup> | 0.103              |
| Diet survey                     |                |                |                             |                             |                     |                    |
| Total dietary intake (kcal/day) | "Haruka"       | 2024.6 ± 427.6 | -                           | 2099.4 ± 391.2              | -                   | 74.8 ± 141.1       |
|                                 | "Shadow Queen" | 1952.8 ± 407.5 | -                           | 1850.6 ± 322.79             | -                   | -102.2 ± 208.8     |
|                                 | <i>p</i> value | -              | -                           | -                           | -                   | 0.073              |
| Protein (g/day)                 | "Haruka"       | 74.2 ± 16.6    | -                           | 73.0 ± 15.9                 | -                   | -1.2 ± 4.8         |
|                                 | "Shadow Queen" | 69.0 ± 10.3    | -                           | 64.9 ± 8.4                  | -                   | -4.1 ± 9.0         |
|                                 | <i>p</i> value | -              | -                           | -                           | -                   | 0.446              |
| Fat (g/day)                     | "Haruka"       | 78.1 ± 23.6    | -                           | 80.5 ± 21.2                 | -                   | 2.3 ± 7.6          |
|                                 | "Shadow Queen" | 69.1 ± 16.9    | -                           | 62.3 ± 13.1 <sup>#</sup>    | -                   | -6.8 ± 7.2         |
|                                 | <i>p</i> value | -              | -                           | -                           | -                   | 0.034 <sup>*</sup> |
| carbohydrate (g/day)            | "Haruka"       | 249.6 ± 41.5   | -                           | 264.1 ± 41.7                | -                   | 14.4 ± 22.3        |
|                                 | "Shadow Queen" | 255.1 ± 59.4   | -                           | 250.7 ± 50.4                | -                   | -4.5 ± 38.7        |
|                                 | <i>p</i> value | -              | -                           | -                           | -                   | 0.260              |
| Daietary fiber (g/day)          | "Haruka"       | 14.1 ± 3.9     | -                           | 15.2 ± 3.2 <sup>#</sup>     | -                   | 1.1 ± 1.0          |
|                                 | "Shadow Queen" | 14.3 ± 2.1     | -                           | 15.2 ± 3.3                  | -                   | 0.9 ± 2.0          |
|                                 | <i>p</i> value | -              | -                           | -                           | -                   | 0.875              |
| Salt (g/day)                    | "Haruka"       | 9.0 ± 2.4      | -                           | 9.9 ± 1.9 <sup>#</sup>      | -                   | 0.9 ± 0.9          |
|                                 | "Shadow Queen" | 9.9 ± 2.1      | -                           | 10.1 ± 1.7                  | -                   | 0.2 ± 1.3          |
|                                 | <i>p</i> value | -              | -                           | -                           | -                   | 0.214              |

Values are shown as the means ± standard deviation. Δ, changes; WBC, white blood cell; RBC, red blood cell; Hb, hemoglobin; Ht, hematocrit; Plt, platelet count; HDL-C, high density lipoprotein cholesterol; LDL-C, low density lipoprotein cholesterol; HbA1c, Hemoglobin A1c; AST, aspartate aminotransferase; ALT, alanine aminotransferase; γGTP, gamma-glutamic transaminase; ALP, alkaline phosphatase; LDH, lactate dehydrogenase; BUN, blood urea nitrogen; CRE, creatinine. Student's t-test for independent samples vs. placebo, paired t-test vs. 0 week was performed to analyze the values. Statistical significance, \*, < 0.05, \*\*, < 0.01 vs. placebo, #, < 0.05, ##, < 0.01 vs. 0 week.
